# Supplementary material
Source: Springer Nature journal article supplement (https://www.springermedizin.de/resource/supplementary/13000_2010_344_MOESM1_ESM.pdf/9624320)

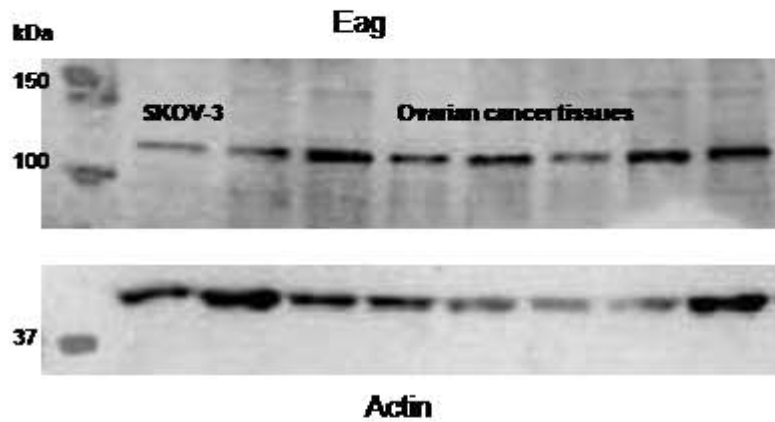

**A**

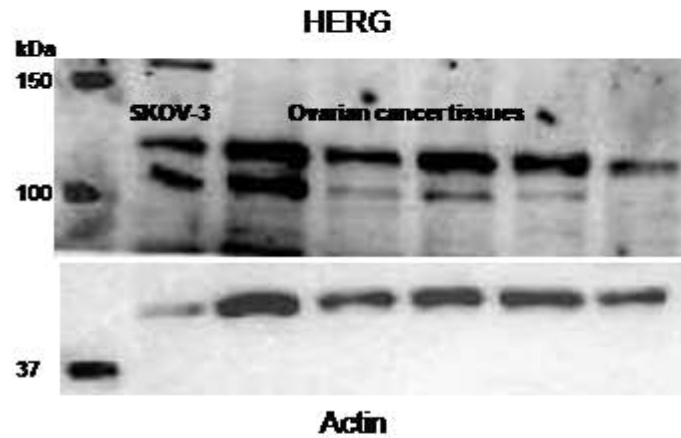

**B**

Supplement: MOESM1 [file 9624320]
